# Supplementary material
Source: PubMed Central journal article supplement (PMC6361127)
Supplement: NIHMS1008556-supplement-Supp_Table_3.pdf [file NIHMS1008556-supplement-Supp_Table_3.pdf]

**Supplemental Table S3.** Incidence of thrombocytopenia and neutropenia grouped by dose and genotype

| Belinostat dose<br>(mg/m <sup>2</sup> /24 h) | Thrombocytopenia |           | Neutropenia |           |
|----------------------------------------------|------------------|-----------|-------------|-----------|
|                                              | Grade 0-2        | Grade 3-4 | Grade 0-2   | Grade 3-4 |
| <b>*28 WT</b>                                |                  |           |             |           |
| 400                                          | 1                | 2         | 1           | 2         |
| 500                                          | 3                | 1         | 4           | 0         |
| 600                                          | 3                | 0         | 3           | 0         |
| 800                                          | 1                | 0         | 0           | 1         |
| <b>*28 HT</b>                                |                  |           |             |           |
| 400                                          | 4                | 2         | 2           | 4         |
| 500                                          | 1                | 1         | 2           | 0         |
| 600                                          | 0                | 2         | 1           | 1         |
| 800                                          | 0                | 1         | 1           | 0         |
| <b>*28 VAR</b>                               |                  |           |             |           |
| 400                                          | 0                | 1         | 0           | 1         |
| 500                                          | 0                | 1         | 0           | 1         |
| 600                                          | 0                | 1         | 0           | 1         |
| <b>*60 WT</b>                                |                  |           |             |           |
| 400                                          | 1                | 0         | 1           | 0         |
| 500                                          | 1                | 0         | 1           | 0         |
| 600                                          | 2                | 0         | 2           | 0         |
| 800                                          | 1                | 0         | 0           | 1         |
| <b>*60 HT</b>                                |                  |           |             |           |
| 400                                          | 2                | 2         | 0           | 4         |
| 500                                          | 2                | 2         | 4           | 0         |
| 600                                          | 1                | 1         | 2           | 0         |
| 800                                          | 0                | 1         | 1           | 0         |
| <b>*60 VAR</b>                               |                  |           |             |           |
| 400                                          | 0                | 3         | 1           | 2         |
| 500                                          | 1                | 1         | 1           | 1         |
| 600                                          | 0                | 2         | 0           | 2         |
| <b>*28 WT + *60 WT</b>                       |                  |           |             |           |
| 500                                          | 1                | 0         | 1           | 0         |
| 600                                          | 2                | 0         | 2           | 0         |
| 800                                          | 1                | 0         | 0           | 1         |
| <b>*28 WT/HT + *60 WT/HT</b>                 |                  |           |             |           |
| 400                                          | 3                | 2         | 1           | 4         |

|                            |   |   |   |   |
|----------------------------|---|---|---|---|
| 500                        | 2 | 2 | 4 | 0 |
| 600                        | 1 | 1 | 2 | 0 |
| 800                        | 0 | 1 | 1 | 0 |
| <b>*28 WT/HT + *60 VAR</b> |   |   |   |   |
| 400                        | 0 | 2 | 1 | 1 |
| 500                        | 1 | 0 | 1 | 0 |
| 600                        | 0 | 1 | 0 | 1 |
| <b>*28 VAR + *60 VAR</b>   |   |   |   |   |
| 400                        | 0 | 1 | 0 | 1 |
| 500                        | 0 | 1 | 0 | 1 |
| 600                        | 0 | 1 | 0 | 1 |

WT = wild-type, HT = heterozygous, VAR = homozygous.
